# Supplementary material
Source: publisher figshare collection journal article supplement (https://acs.figshare.com/ndownloader/files/26408030)
Supplement: Supplementary file 1 [file 26408030]

# Supporting Information

## Label-free and Ultrasensitive Electrochemiluminescent Immunosensor Based on Novel Luminophores of Ce<sub>2</sub>Sn<sub>2</sub>O<sub>7</sub> Nanocubes

Malik Saddam Khan, Hafsa Ameer, Yuwu Chi\*

*MOE Key Laboratory of Analytical Science of Food Safety and Biology, Fujian  
Provincial Key Laboratory of Analysis and Detection for Food Safety, and College of  
Chemistry, Fuzhou University, Fuzhou 350108, P.R. China*

\* Corresponding author: E-mail address: y.w.chi@fzu.edu.cn; Tel: +86 13489967315;  
Fax: +86 591 22866137.

### Content

|                                                                                                                                      |    |
|--------------------------------------------------------------------------------------------------------------------------------------|----|
| 1. Chemicals, Materials, and Instrumentation.....                                                                                    | S2 |
| 2. HAADF STEM Image, Element Mapping Images and EDS of Ce <sub>2</sub> Sn <sub>2</sub> O <sub>7</sub> (Figure<br>S1) .....           | S3 |
| 3. Measurement for ECL Quantum Efficiency.....                                                                                       | S4 |
| 4. PL Spectra of Ce <sub>2</sub> Sn <sub>2</sub> O <sub>7</sub> Nanocubes under Different Excitation Wavelengths (Figure<br>S2)..... | S5 |
| 5. A Comparison of the Performances of Proposed and Referenced Sensors for Detection<br>of CEA (Table S1).....                       | S6 |
| 6. Results Obtained for CEA Detection in Serum Samples (Table S2).....                                                               | S7 |
| 7. References.....                                                                                                                   | S8 |

**Chemicals and Materials.** Human CEA antibody (anti-CEA) and Human CEA antigen were purchased from Shanghai Linc-Bio Science Co. Ltd.  $\text{HAuCl}_4 \cdot 3\text{H}_2\text{O}$ , Sodium borohydride ( $\text{NaBH}_4$ ),  $\text{Ce}(\text{NO}_3)_3 \cdot 6\text{H}_2\text{O}$ ,  $\text{K}_2\text{SnO}_3 \cdot 3\text{H}_2\text{O}$ , 3-aminopropyltriethoxysilane (APTES, 98%) and NaOH were obtained from Shanghai Aladdin Chemistry Co., Ltd, China. Potassium peroxydisulfate was acquired from Fuchen Chemical Reagent Co., Ltd. (Tianjin, China). Bovine serum albumin (BSA) was obtained from the Sigma-Aldrich (Beijing, China). The phosphate-buffered saline (PBS) with a number of pH value was prepared through mixing the stock solution of  $\text{NaH}_2\text{PO}_4$  (0.1 M) and  $\text{Na}_2\text{HPO}_4$  (0.1 M), PBS containing potassium peroxydisulfate as an electrolyte was used to perform the entire electrochemical measurements experiments. Double-distilled water was used during the whole of experiments. All of the chemicals were of analytical reagent grade and utilised without further treatment.

**Instrumentation.** The Transmission Electron Microscopy (TEM), High-Resolution TEM (HRTEM) and Energy Dispersive Spectroscopic (EDS) photos of  $\text{Ce}_2\text{Sn}_2\text{O}_7$  and  $\text{Au}@\text{Ce}_2\text{Sn}_2\text{O}_7$  were attained by an FEI Talos F200S G2 microscope (Thermo Scientific FEI, United States). X-ray power diffraction (XRD) pattern was accomplished with a D/MAX 2200 VPC powder diffractometer (Rigaku, Japan). The Raman spectroscopic spectra were recorded by a confocal Raman microspectrometer with an excitation wavelength of 533.0 nm (Renishaw inVia, UK). ECL tests for  $\text{Ce}_2\text{Sn}_2\text{O}_7$  were attained with an EC&ECL multifunctional analyzer (MPI-E, Remex Electronic Instrument Co., Ltd., Xi'an, China) through using three conventional electrode systems: by using glassy carbon electrode (GCE, 3 mm in diameter) as a working electrode, Ag/AgCl as a reference electrode and platinum wire as an auxiliary electrode. ECL emission spectra of  $\text{Ce}_2\text{Sn}_2\text{O}_7\text{--K}_2\text{S}_2\text{O}_8$  system and the related ECL photos on GC electrodes were recorded through an IsoPlane 160 spectrometer equipped with a ProEM HS EMCCD camera (Princeton Instruments) by a cooling temperature of  $-60\text{ }^\circ\text{C}$ . The photoluminescence (PL) spectrum was recorded in the spectral range of 300–600 nm at RT (room temperature) using a Xe laser with a wavelength of 280 nm as the excitation source. Electrochemical impedance spectroscopy (EIS) tests were accomplished by Autolab AUT302N, Metrohm Autolab .BV (Netherlands)<sup>1</sup>.

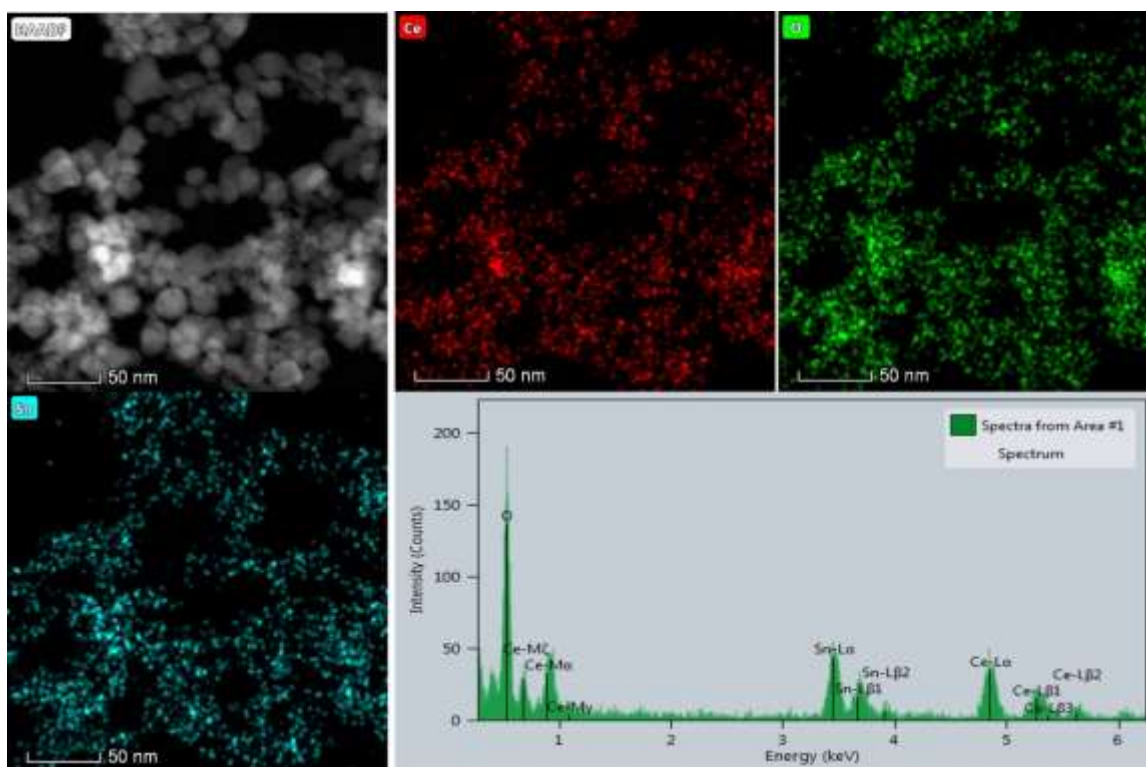

**Figure S1.** HAADF STEM image and corresponding mapping images and EDS of  $\text{Ce}_2\text{Sn}_2\text{O}_7$ .

## Measurement for ECL Quantum Efficiency

The ECL quantum efficiency of Ce<sub>2</sub>Sn<sub>2</sub>O<sub>7</sub> nanocubes was measured according to Equation S1.<sup>s1</sup>

$$\phi_{ECL} = \phi_{ECL}^{\circ} \frac{IQ^{\circ}}{I^{\circ}Q} = 5\% \times \frac{11980(a.u. \ s) \times 0.1588 (Coulombs)}{7950(a.u. \ s) \times 0.2626 (Coulombs)} = 4.55\% \quad (S1)$$

whereas  $\phi_{ECL}$ ,  $\phi_{ECL}^{\circ}$  are the ECL quantum efficiencies of Ce<sub>2</sub>Sn<sub>2</sub>O<sub>7</sub> (the target ECL luminophore) and Ru(bpy)<sub>3</sub><sup>2+</sup> (the standard ECL luminophore,  $\phi_{ECL}^{\circ} = 5.0\%$ ), while  $I$  and  $I^{\circ}$  are their integrated ECL intensities, where  $Q$  and  $Q^{\circ}$  are the charges passed through Ce<sub>2</sub>Sn<sub>2</sub>O<sub>7</sub> and Ru(bpy)<sub>3</sub><sup>2+</sup>, correspondingly. From the acquired result it can be concluded that the ECL efficiency of Ce<sub>2</sub>Sn<sub>2</sub>O<sub>7</sub> was strong with a value of 4.55%.

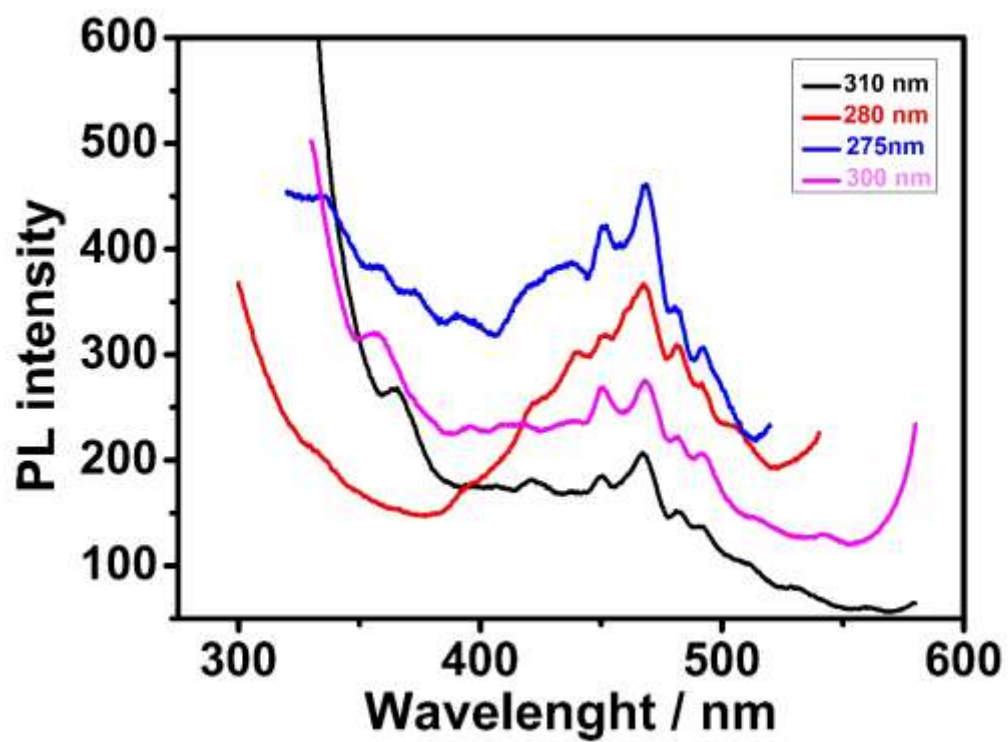

**Figure S2.** PL spectra of Ce<sub>2</sub>Sn<sub>2</sub>O<sub>7</sub> nanocubes under different excitation wavelengths.

**Table S1.** A comparison of the performances of proposed and referenced sensors for detection of CEA.

| ECL materials of Sensors                          | Linear range   | Detection limit | References |
|---------------------------------------------------|----------------|-----------------|------------|
| ZnS–CdS/MoS <sub>2</sub>                          | 0.05-20 ng/mL  | 31 pg/mL        | S2         |
| Au-g-C <sub>3</sub> N <sub>4</sub> NHs            | 0.02–80 ng/mL  | 6.8 pg/mL       | S3         |
| GO/MWCNTs-COOH/Au@CeO <sub>2</sub>                | 0.05-100 ng/mL | 20 pg/mL        | S4         |
| AuNPs/PDDA/cit-rGO-BaYF <sub>5</sub>              | 0.001-80 ng/mL | 0.87 pg/mL      | S5         |
| Au@Ce <sub>2</sub> Sn <sub>2</sub> O <sub>7</sub> | 0.01-50 ng/mL  | 0.53 pg/mL      | This work  |

**Table S2.** Results obtained for CEA detection in serum samples

| Initial CEA<br>concentration<br>in sample<br>(ng/mL) | Added CEA<br>concentration<br>(ng/mL) | Measured<br>concentration<br>after addition<br>(ng/mL) | Average<br>value<br>(ng/mL) | RSD<br>(%,n=5) | Recovery<br>(%, n=5) |
|------------------------------------------------------|---------------------------------------|--------------------------------------------------------|-----------------------------|----------------|----------------------|
| 1.44                                                 | 0.5                                   | 1.90, 2.01,<br>2.05, 1.97, 1.87                        | 1.96                        | 3.8            | 101.1                |
|                                                      | 1.5                                   | 2.94, 3.01,<br>2.91, 2.88, 2.99                        | 2.95                        | 1.8            | 100.3                |
|                                                      | 3.0                                   | 4.42, 4.36,<br>4.46, 4.39, 4.40                        | 4.40                        | 0.8            | 99.1                 |

## REFERENCES

- (S1) Richter, M. M., Electrochemiluminescence (ecl). *Chem. Rev.* **2004**, *104* (6), 3003-3036.
- (S2) Wang, Y.L.; Cao, J.T.; Chen, Y.H.; Liu, Y.M., A label-free electrochemiluminescence aptasensor for carcinoembryonic antigen detection based on electrodeposited ZnS–CdS on MoS<sub>2</sub> decorated electrode. *Anal. Methods.* **2016**, *8* (26), 5242-5247.
- (S3) Chen, L.; Zeng, X.; Si, P.; Chen, Y.; Chi, Y.; Kim, D. H.; Chen, G., Gold nanoparticle-graphite-like C<sub>3</sub>N<sub>4</sub> nanosheet nanohybrids used for electrochemiluminescent immunosensor. *Anal Chem.* **2014**, *86* (9), 4188-95.
- (S4) Pang, X.; Li, J.; Zhao, Y.; Wu, D.; Zhang, Y.; Du, B.; Ma, H.; Wei, Q., Label-free electrochemiluminescent immunosensor for detection of carcinoembryonic antigen based on nanocomposites of GO/MWCNTs-COOH/Au@CeO<sub>2</sub>. *ACS Appl. Mater. Interfaces.* **2015**, *7* (34), 19260-19267.
- (S5) Zhao, L.; Li, J.; Liu, Y.; Wei, Y.; Zhang, J.; Zhang, J.; Xia, Q.; Zhang, Q.; Zhao, W.; Chen, X., A novel ECL sensor for determination of carcinoembryonic antigen using reduced graphene Oxide-BaYF<sub>5</sub>: Yb, Er upconversion nanocomposites and gold nanoparticles. *Sens. Actuators. B-Chem.* **2016**, *232*, 484-491.
